# Supplementary material
Source: PubMed Central journal article supplement (PMC8459324)
Supplement: mmc2.pdf [file mmc2.pdf]

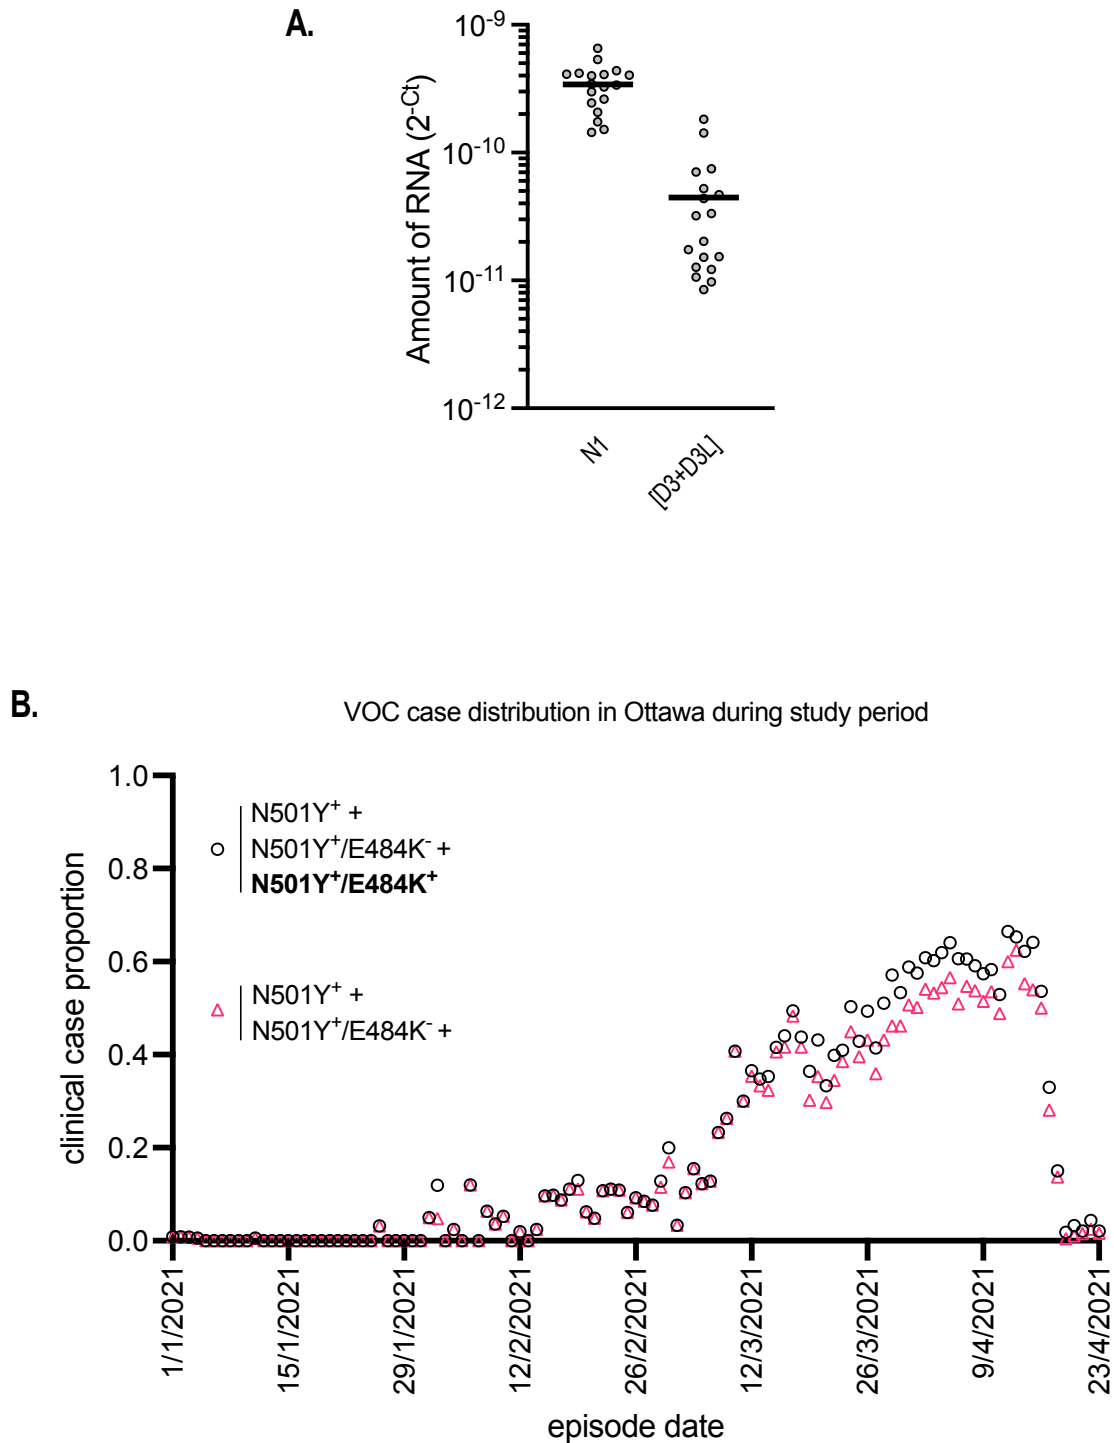

**Figure S2 (related to Figure 3). (A) Functional sensitivity of D3L vs. N1 in wastewater.** The distribution of N1 amplicon expression vs. the sum of D3 and D3L amplicon signal was compared in wastewater samples from Ottawa ( $n=18$ ). Both measures should represent the total signal contributed by both non-B.1.1.7 and B.1.1.7 viral RNAs but measured based on neighbouring but sufficiently different genomic loci. **(B) Distribution of VOC case proportion in Ottawa during study period.** The effect of omitting N501Y<sup>+</sup>/E484<sup>+</sup> cases (i.e. probable B.1.351 or P.1 VOC) on case proportion is minimal.
